# Supplementary material for: Therapeutic silencing of SMOC2 prevents kidney function loss in mouse model of chronic kidney disease
Source: PubMed Central journal article supplement — iScience. 2021 Sep 29;24(10):103193. doi: 10.1016/j.isci.2021.103193 (PMC8524153; doi:10.1016/j.isci.2021.103193), 2021-09-29
Supplement: mmc1.pdf [file mmc1.pdf]

**iScience, Volume 24**

**Supplemental information**

**Therapeutic silencing of SMOC2  
prevents kidney function loss in mouse  
model of chronic kidney disease**

**Cuiyan Xin, Jiahui Lei, Qian Wang, Yixia Yin, Xiaoqian Yang, Jose Alberto Moran Guerrero, Venkata Sabbiseti, Xiaoming Sun, Vishal S. Vaidya, and Joseph V. Bonventre**

## SUPPLEMENTARY TABLES

| ANTIBODY      | DILUTION | IDENTIFIER                    | CAT. NO  |
|---------------|----------|-------------------------------|----------|
| SMOC2         | 1:250    | Santa Cruz Biotechnology Inc. | sc-67396 |
| $\alpha$ -SMA | 1:500    | Sigma-Aldrich                 | A2547    |
| COLLAGEN 1    | 1:200    | Abcam                         | ab600408 |
| FIBRONECTIN   | 1:200    | Abcam                         | ab23750  |
| F4/80         | 1:200    | Abcam                         | ab6640   |
| PDGFR $\beta$ | 1:200    | Abcam                         | ab32570  |

Supplemental table 1 (Table S1), related to STAR Methods, section of *In vivo* immunofluorescence.

List of primary antibodies for immunostaining.

| ANTIBODY                         | DILUTION | IDENTIFIER                    | CAT. NO  |
|----------------------------------|----------|-------------------------------|----------|
| P-P42/44 (T202/Y204)             | 1:1000   | Cell Signaling                | 4377S    |
| P-P38 (T180/Y182)                | 1:1000   | Cell Signaling                | 9211S    |
| P-JNK                            | 1:1000   | Cell Signaling                | 9251S    |
| P-AKT (S473)                     | 1:1000   | Cell Signaling                | 9271S    |
| P-MTOR                           | 1:1000   | Cell Signaling                | 2971S    |
| P-SMAD 2 (S465/467)/3 (S423/425) | 1:1000   | Cell Signaling                | 13820S   |
| SMOC2                            | 1:1000   | Santa Cruz Biotechnology Inc. | sc-67396 |
| BCN1 (E-8)                       | 1:1000   | Santa Cruz Biotechnology Inc. | sc-48341 |
| COLLAGEN 1                       | 1:1000   | Abcam                         | ab600408 |
| FIBRONECTIN                      | 1:1000   | Abcam                         | ab23750  |
| GAPDH                            | 1:1000   | Abcam                         | ab181602 |
| $\alpha$ -SMA                    | 1:5000   | Sigma-Aldrich                 | A2547    |

Supplemental table 2 (Table S2), related to STAR Methods, section of Immunoblotting. List of primary antibodies for Western Blot.

| <b>INHIBITOR</b>                         | <b>INHIBITOR OF</b>  | <b>IDENTIFIER</b> | <b>CAT. NO</b> |
|------------------------------------------|----------------------|-------------------|----------------|
| <b>ATN-161 (AC-PHSCN-NH<sub>2</sub>)</b> | Integrin $\alpha$ 5  | Selleckchem       | S8454          |
| <b>CHLOROQUINE DIPHOSPHATE SALT</b>      | Lysosome             | Sigma             | C 6628-50G     |
| <b>GW788388</b>                          | ALK5/TGF $\beta$ RII | Selleckchem       | S2750          |
| <b>LY2109761</b>                         | TGF $\beta$ RII      | Selleckchem       | S2704          |
| <b>LY294002</b>                          | Akt                  | GIBCO             | PHZ1144        |
| <b>3-MA</b>                              | Autophagy            | Millipore Sigma   | 189490-100MG   |
| <b>MHY1485</b>                           | mTOR Activator       | Millipore Sigma   | 5005540001     |
| <b>SB203580</b>                          | P38                  | Selleckchem       | S1076          |
| <b>SB273005</b>                          | Integrin             | Selleckchem       | S7540          |
| <b>SB431542</b>                          | ALK5                 | Selleckchem       | S1067          |
| <b>SP600125</b>                          | JNK                  | Selleckchem       | S1460          |
| <b>U0126</b>                             | P42/44               | EMD Millipore     | 19-147         |

Supplemental table 3 (Table S3), related to STAR Methods, section of *In vitro* inhibitional experiments. List of inhibitors.

| <b>GENE</b>                                          | <b>SEQUENCES</b>                                                                |
|------------------------------------------------------|---------------------------------------------------------------------------------|
| <i>Collagen 1</i><br>Forward<br>Reverse              | 5'- GAG CGG AGA GTA CTG GAT CG-3'<br>5'- GTT CGG GCT GAT GTA CCA GT-3'          |
| <i>Fibronectin</i><br>Forward<br>Reverse             | 5'- CCA CCC CCA TAA GGC ATA GG-3'<br>5'- GTA GGG GTC AAA GCA CGA GTC ATC-3'     |
| <i><math>\alpha</math>-SMA</i><br>Forward<br>Reverse | 5'- ATC ATG CGT CTG GAC TTG G-3'<br>5'- AAT AGC CA GCT Cag TCA GG-3'            |
| <i>PDGFR<math>\beta</math></i><br>Forward<br>Reverse | 5'- CAC CTT CTC CAG TGT GCT GA-3'<br>5'- GGA GTC CAT AGG GAG GAA GC-3'          |
| <i>IL-1<math>\beta</math></i><br>Forward<br>Reverse  | 5'- GCA CTA CAG GCT CCG AGA TGA AC-3'<br>5'- TTG TCG TTG CTT GGT TCT CCT TGT-3' |
| <i>IL-6</i><br>Forward<br>Reverse                    | 5'- GAG GAT ACC ACT CCC AAC AGA CC-3'<br>5'- AAG TGC ATA ATC GTT GTT CAT ACA-3' |
| <i>TNF<math>\alpha</math></i><br>Forward<br>Reverse  | 5'- TAG CCA GGA GGG AGA ACA GA-3'<br>5'- TTT TCT GGA GGG AGA TGT GG-3'          |
| <i>TGF<math>\beta</math>1</i><br>Forward<br>Reverse  | 5'- GAA GGA CCT GGG TTG GAA GTG G-3'<br>5'- CGT AGT AGA CGA TGG GCA GTG G-3'    |
| <i>GAPDH</i><br>Forward<br>Reverse                   | 5'- ATC TTG GGC TAC ACT GAG GA-3'<br>5'- CAG GAA ATG AGC TTG ACA AAG-3'         |

Supplemental table 4 (Table S4), related to STAR Methods, section of Quantitative PCR. List of primer sequences.

## SUPPLEMENTARY FIGURES AND LEGENDS

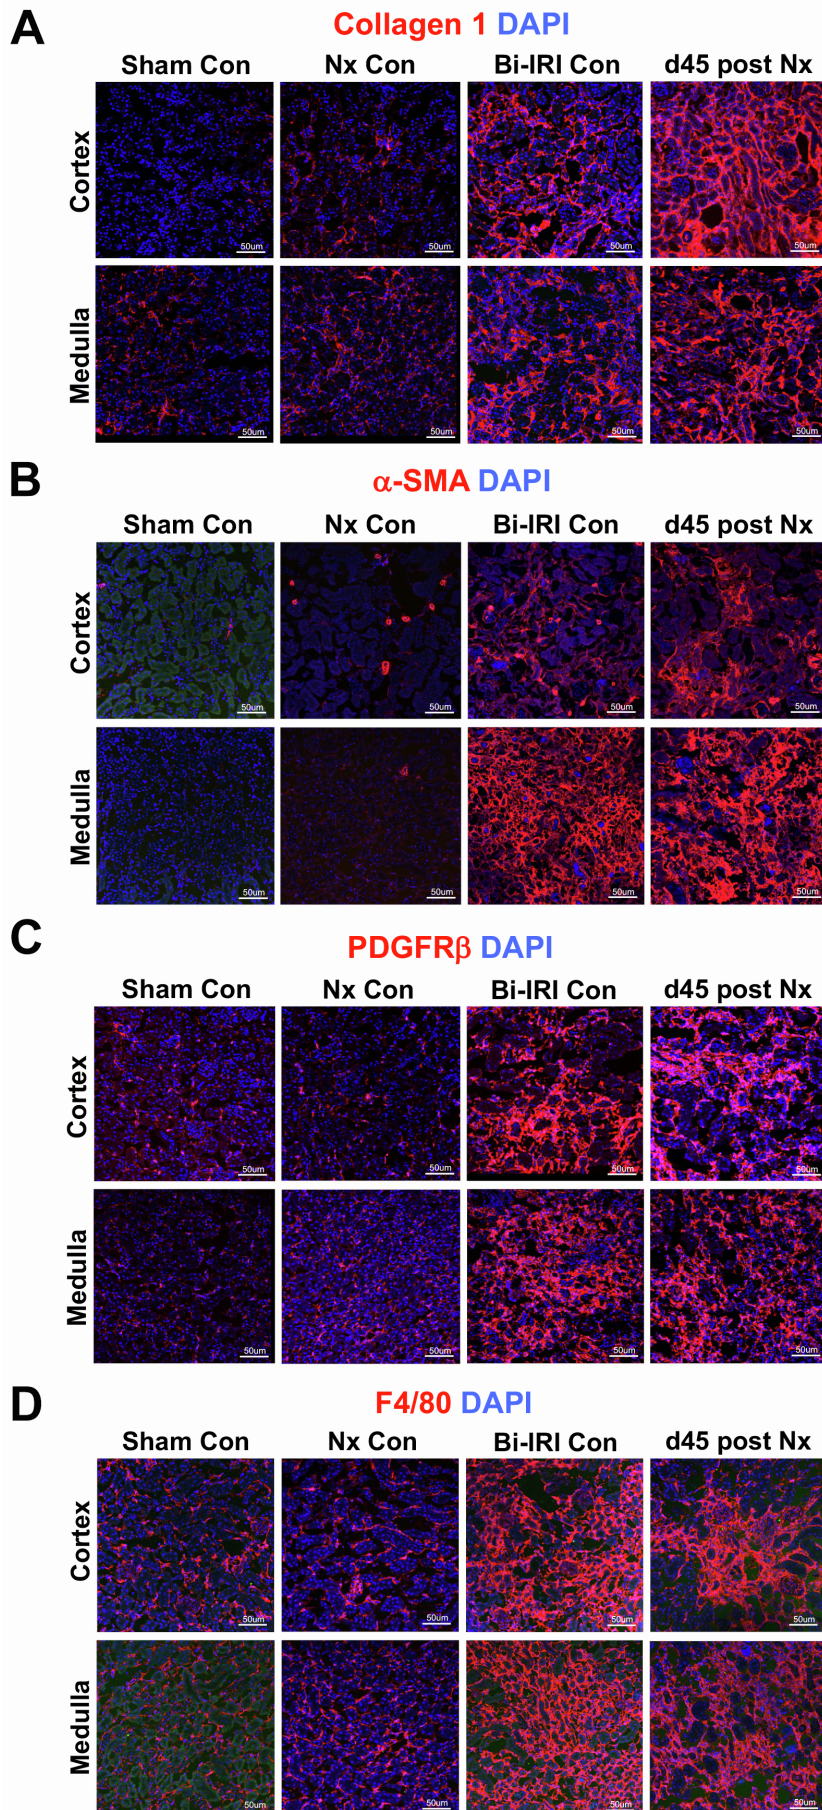

**Supplemental Figure 1 (Fig S1), related to Figure 1. Mouse chronic kidney disease (CKD) model.**

Immunofluorescent staining of different markers (20x magnification and scale bar, 50um) in cortex and medulla of kidney in mouse CKD model compare with sham as indicated (A) collagen 1; (B)  $\alpha$ -SMA; (C) PDGFR $\beta$ ; (D) F4/80. n=6/group unless otherwise stated.

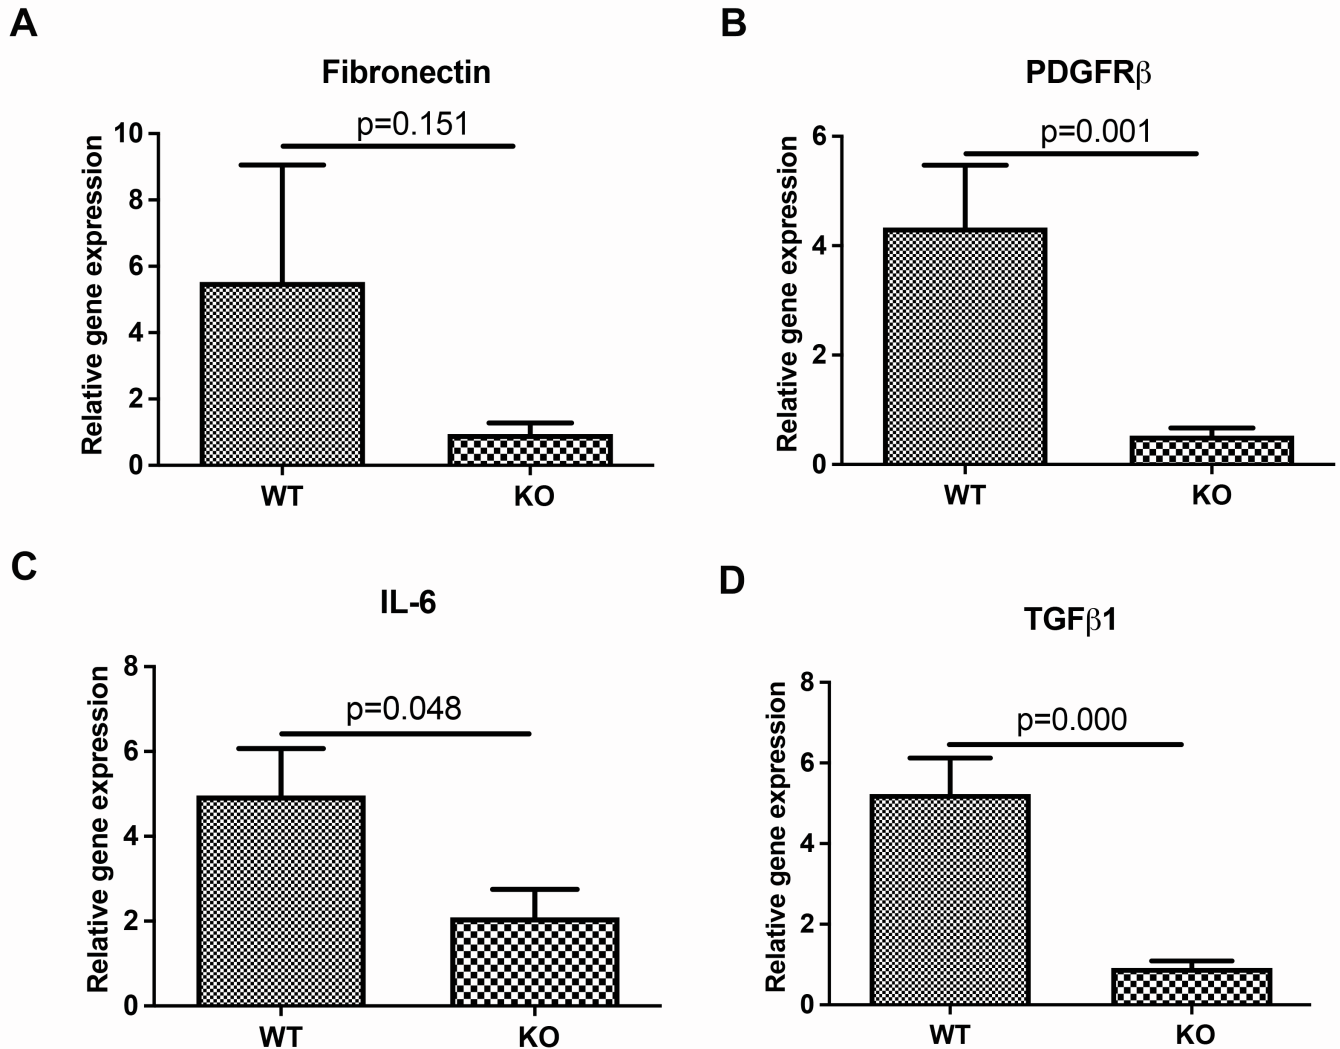

**Supplemental Figure 2 (Fig S2), related to Figure 3. Genes expression in whole CKD kidney tissue of SMOC2 KO compared with WT.**

(A-D) Quantitative PCR for transcripts of matrix proteins, fibrotic factors and inflammatory factors.

n=6/group unless otherwise stated. Data are represented as mean +/- SEM.

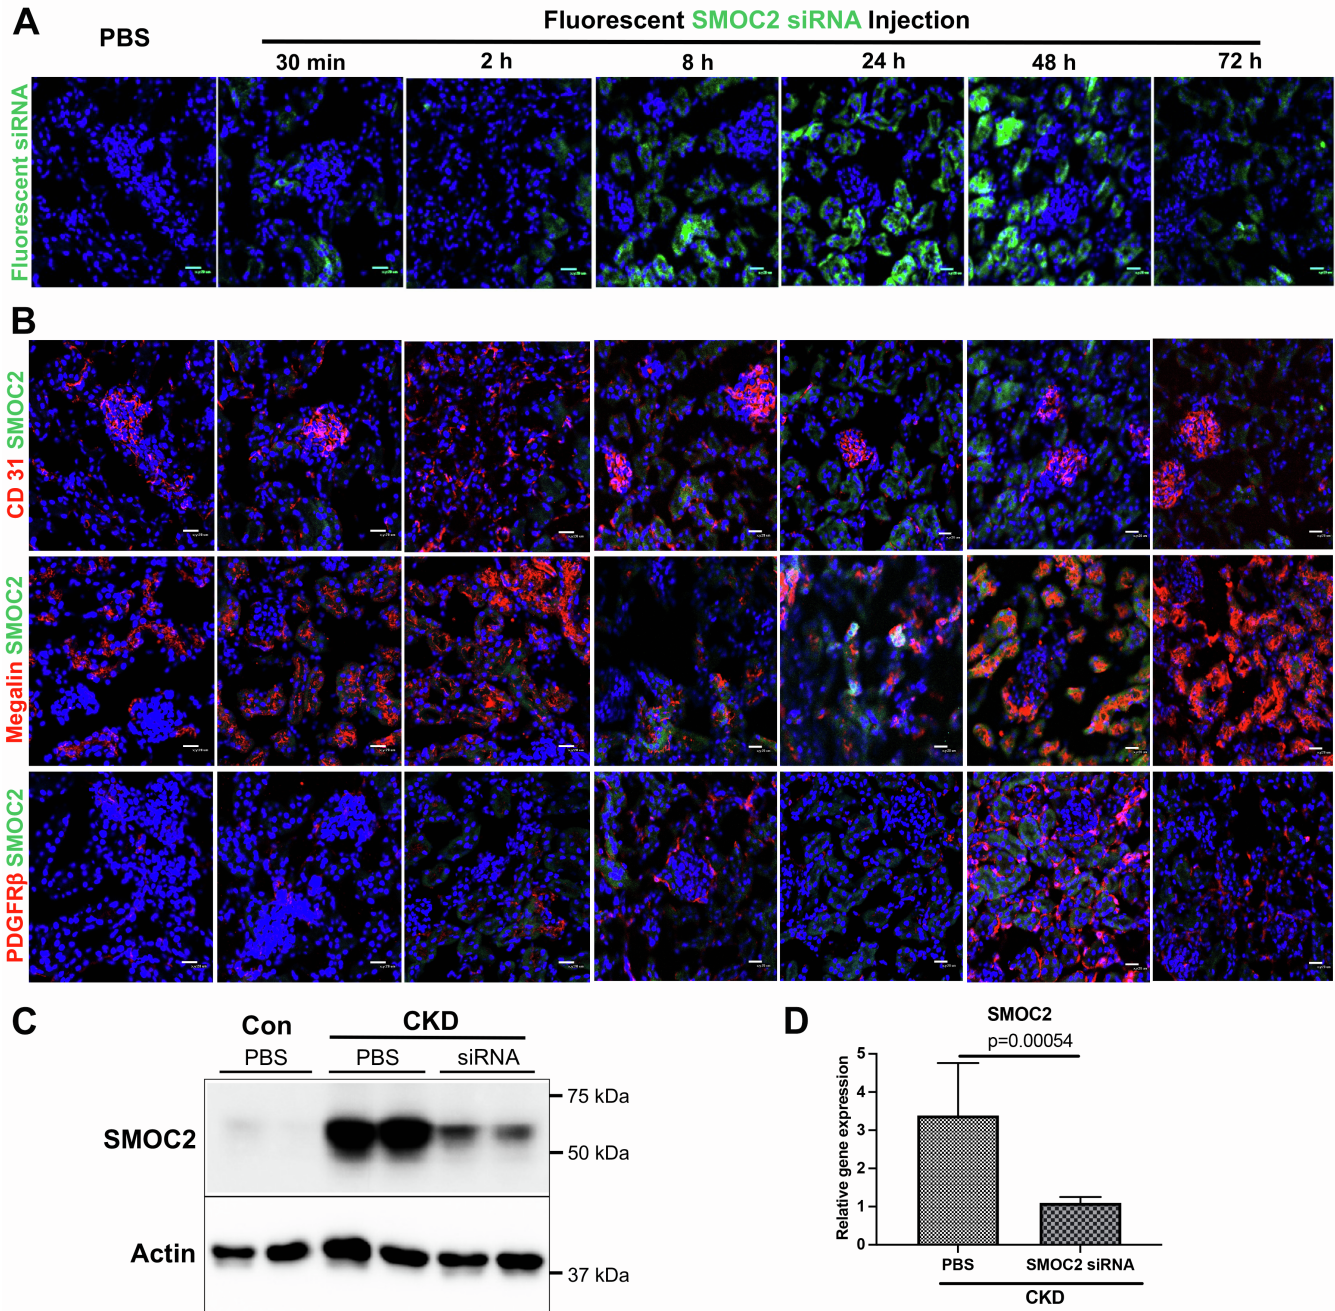

Supplemental Figure 3 (Fig S3), related to Figure 4. SMOC2 siRNA delivery and distribution in mouse kidney.

(A,B) C57Bl6 mice were administrated with PBS or fluorescent SMOC2 siRNA (30 mg/200ul) via retro-orbital vein injection. Kidneys were harvested at 30 min, 2 h, 8 h, 24 h, 48 h and 72 h. (A) Fluorescent SMOC2 siRNA deposition in the kidney and (B) SMOC2 siRNA distribution in proximal tubules (Megalin+) and identified in endothelial cells (CD31+) and glomerular cells (PDGFRβ+)

SMOC2, a therapeutic target for CKD

(C,D) Mice subjected to experimental CKD then received either SMOC2 siRNA (30 mg/200ul) or PBS at day 21 post nephrectomy surgery twice/week until day 43. SMOC2 depletion was confirmed at protein (C) and mRNA (D) level.

Immunofluorescence staining with 40x magnification and scale bar, 20um. n=6/group unless otherwise stated. Data are represented as mean +/- SEM.

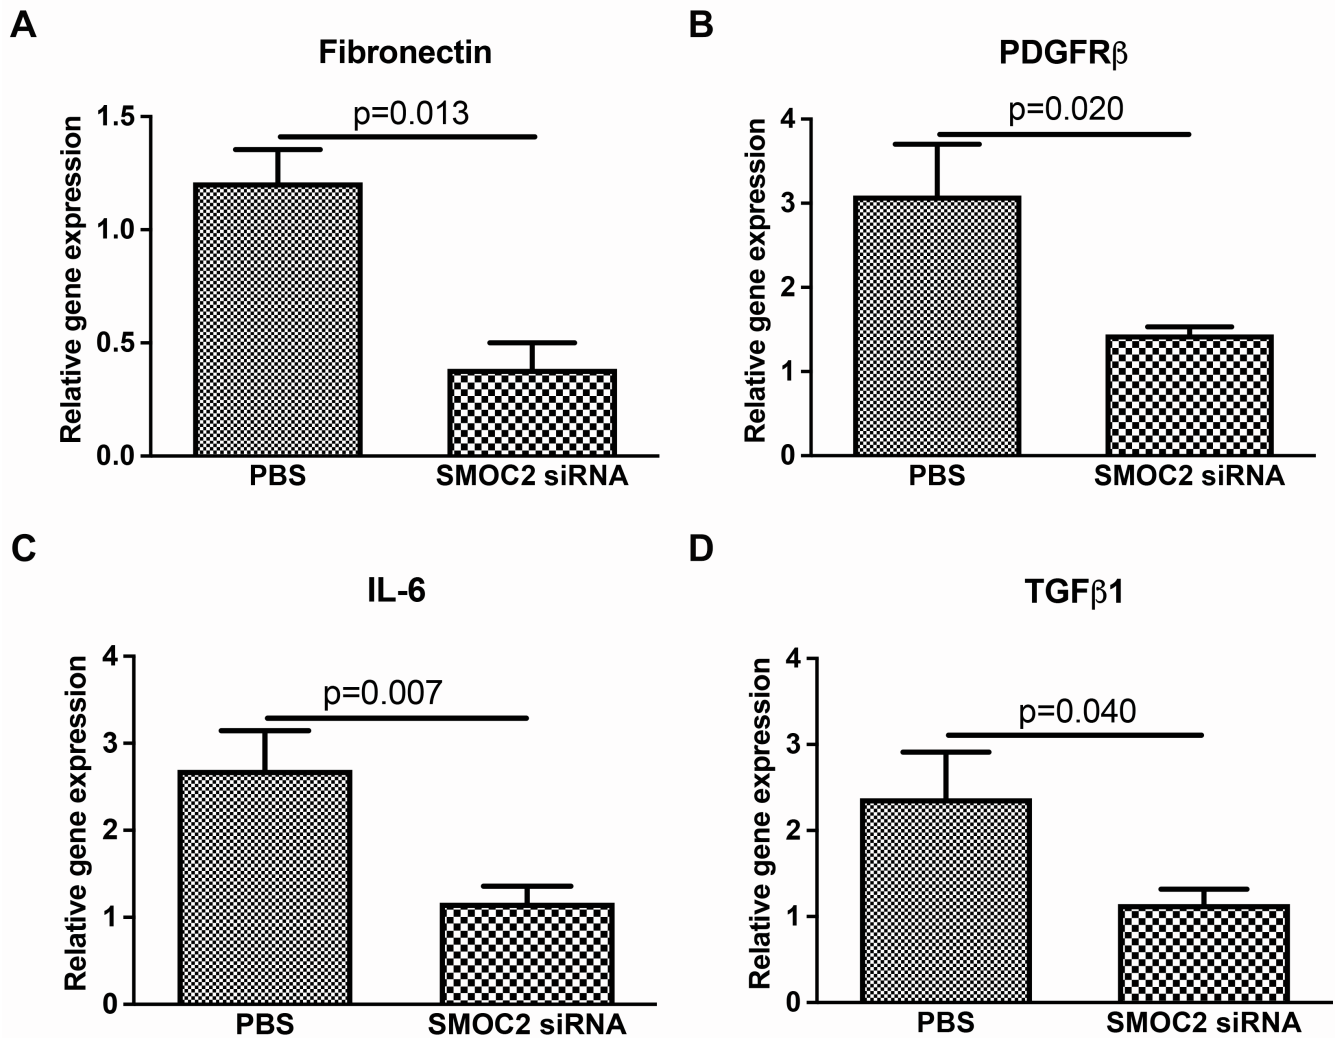

Supplemental Figure 4 (Fig S4), related to Figure 4. Genes expression in whole CKD kidney tissue of SMOC2 siRNA treatment compared with vehicle treatment.

(A-D) Quantitative PCR for transcripts of matrix proteins, fibrotic factor and inflammatory factors.

n=6/group unless otherwise stated. Data are represented as mean +/- SEM.



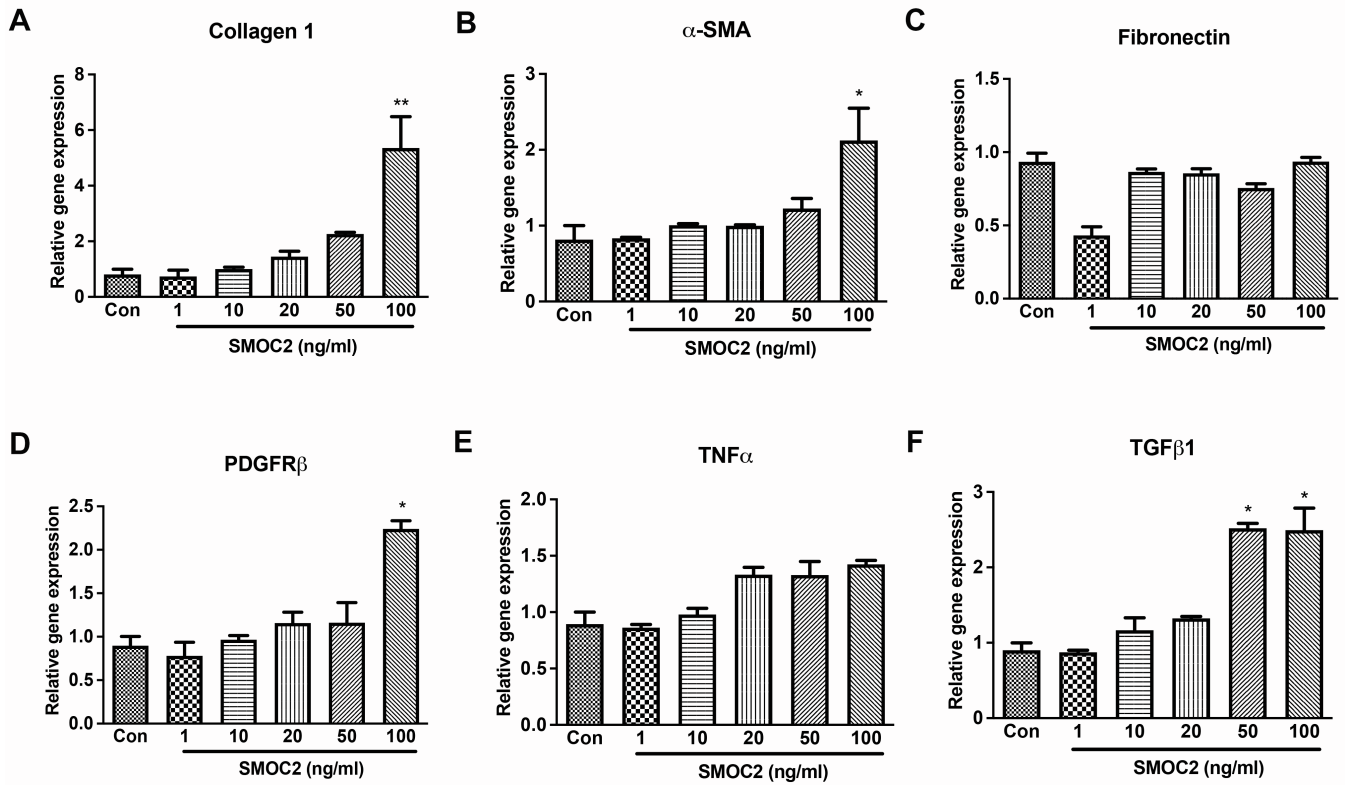

**Supplemental Figure 5 (Fig S5), related to Figure 5. SMOC2 induced genes expression.**

NIH/3T3 cells were incubated with SMOC2 recombinant protein for 24 hours with 1, 10, 20, 50, 100 ng/ml. Quantitative PCR for transcripts of matrix proteins, fibrotic factors and inflammatory factors (A-F). Quantification are representative of three independent experiments. \*P<0.05; \*\*P<0.01; \*\*\*P<0.001. Data are represented as mean +/- SEM.

## SMOC2, a therapeutic target for CKD

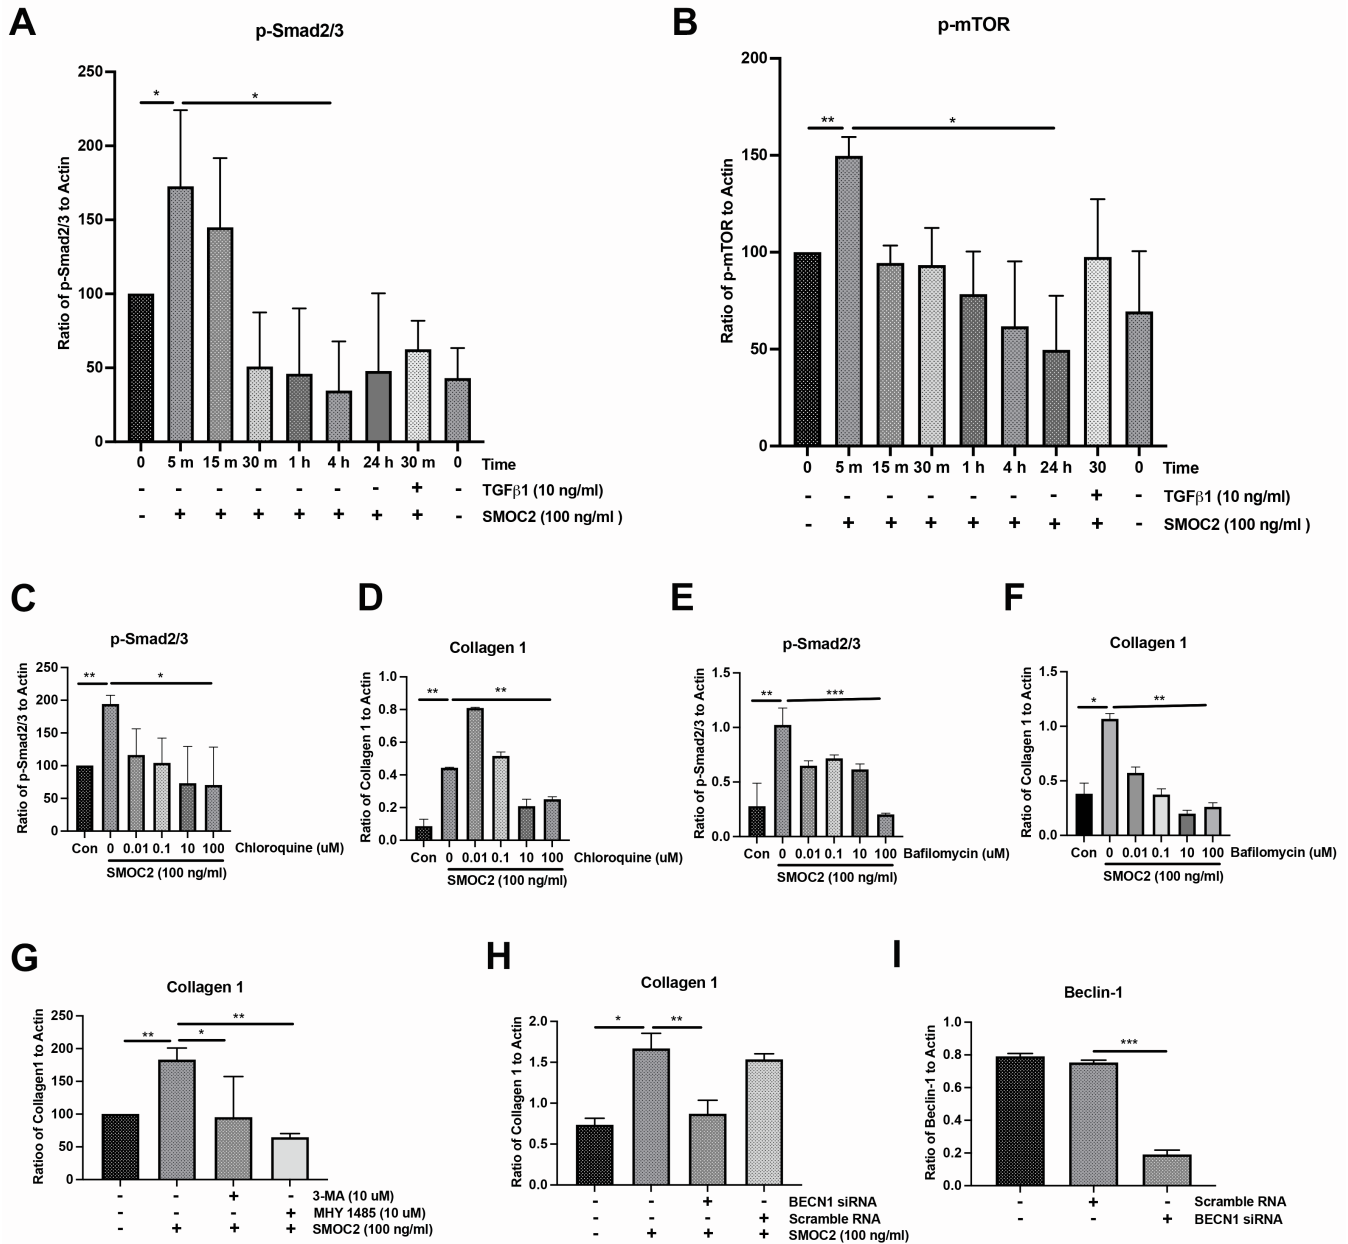

Supplemental Figure 6 (Fig S6), related to Figure 5. Western Blots analysis of lysosome-autophagosome signaling pathways involved in SMOC2-induced kidney fibrosis.

(A-I) Ratio of target protein expression to Actin. \*P<0.05; \*\*P<0.01; \*\*\*P<0.001. Data are represented as mean +/- SEM.

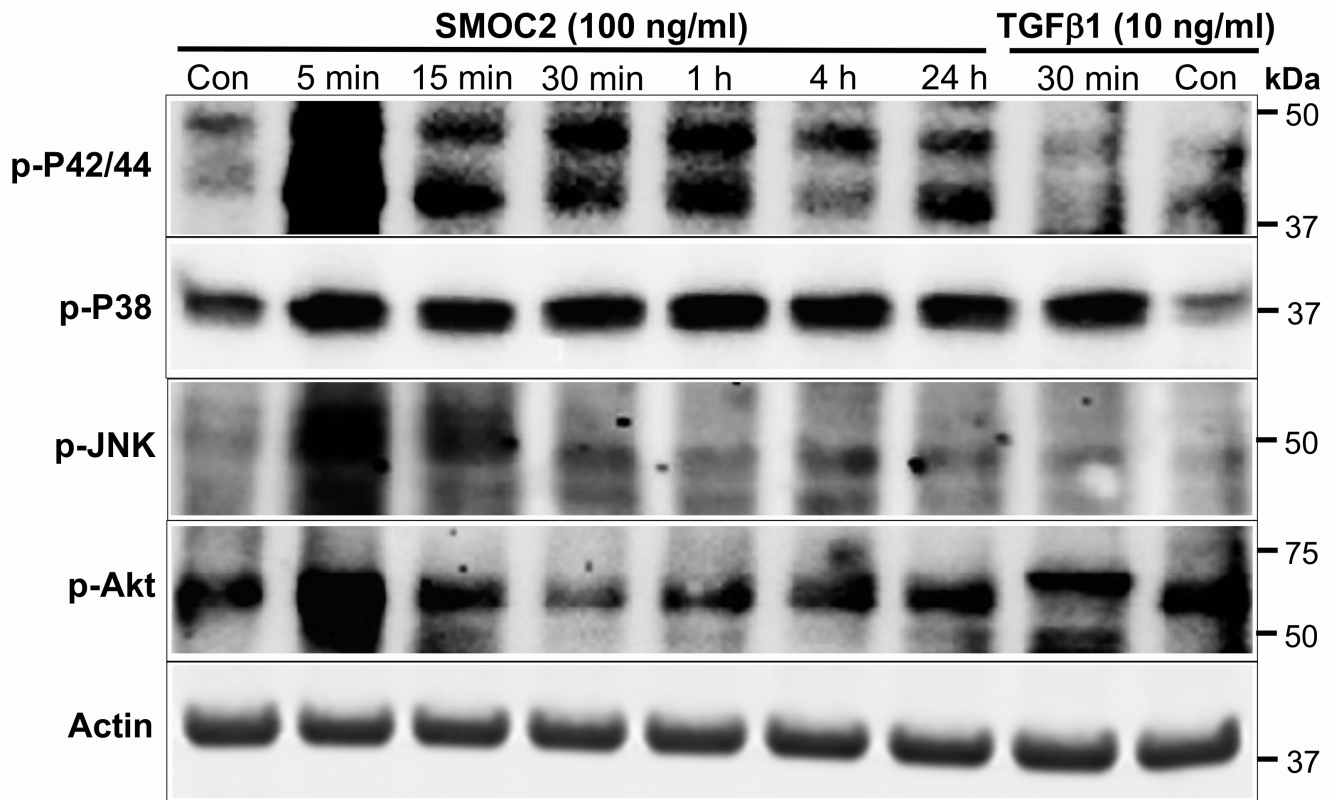

**Supplemental Figure 7 (Fig S7), related to Fig 6. SMOC2 induced phosphorylation of MAPKs and Akt.**

NIH/3T3 cells were treated with either SMOC2 (100 ng/ml) at 5 min, 15 min, 30 min, 1 h, 4 h and 24 h, or TGFβ1 (10 ng/ml). Cell lysates were performed by Western Blotting analysis and showed phosphorylation of MAPKs (p-P42/44, p-P38, p-JNK) and Akt (p-Akt), and control of Actin expression showed same as in Fig 5A. Blots are representative of three independent experiments.

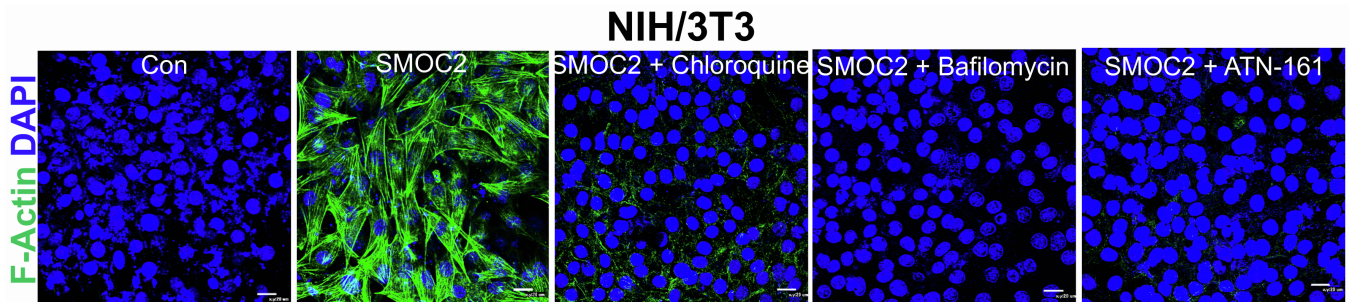

**Supplemental Figure 8 (Fig S8), related to Figure 6. SMOC2 triggered cell differentiation.**

NIH/3T3 cells were co-incubated with SMOC2 (100 ng/ml, 24 h) and lysosome inhibitors of Chloroquine (10 uM, 24 h), Bafilomycin (10 uM, 24 h) and Integrin  $\alpha$ 5 inhibitor of ATN-161 (10 uM, 24 h), cell differentiation was represented by F-Actin (Green) staining. Immunofluorescence staining with 40x magnification and scale bar, 20um. Images are representative of three independent experiments.
